# Supplementary material for: A Design Pattern for Decentralised Decision Making
Source: PubMed Central journal article supplement (PMC4619747; doi:10.1371/journal.pone.0140950), 2015-10-23
Supplement: pone.0140950.s002.pdf [file pone.0140950.s002.pdf]

---

## A design pattern for decentralised decision making (S2 Text)

Andreagiovanni Reina<sup>1,✉</sup>, Gabriele Valentini<sup>1</sup>, Cristian Fernández-Oto<sup>2</sup>, Marco Dorigo<sup>1</sup>, Vito Trianni<sup>3,✉</sup>,

**1 IRIDIA, Université Libre de Bruxelles, Brussels, Belgium**

**2 Faculté des Sciences, Université Libre de Bruxelles, Brussels, Belgium**

**3 ISTC, Consiglio Nazionale delle Ricerche, Rome, Italy**

✉These authors contributed equally to this work.

\* vito.trianni@istc.cnr.it

### Stability analysis and parameterisation choice for multiagent simulations on fully-connected networks

To determine the parameters of case study I-A, we analyse the macroscopic ODE model. To meet the requirement of consensus decision, the model must display equilibria for the points  $S_A = \{\Psi_A = 1, \Psi_B = 0\}$  and  $S_B = \{\Psi_A = 0, \Psi_B = 1\}$ . The system has equilibria  $S_A$  and  $S_B$  for  $\alpha_A = \alpha_B = 0$ . We choose  $\sigma_A = \sigma_B = 1$ , and we perform a stability analysis of the system as a function of the parameters  $\gamma_i, \rho_i, i \in \{A, B\}$ . Given the domain space:

$$\begin{cases} 0 \leq \Psi_i \leq 1, & i \in \{A, B\} \\ 0 \leq \Psi_U \leq 1 \\ \Psi_A + \Psi_B + \Psi_U = 1 \end{cases}, \quad (1)$$

the analysis of the macroscopic ODE model reveals three possible equilibria:  $S_A, S_B$  and  $S_X$ . Equilibria  $S_A$  and  $S_B$  do not change position and are always present for any parameterisation but change stability. In contrast, equilibrium  $S_X$  is always unstable and appears only when  $S_A$  and  $S_B$  are both stable, as a function of the parameters  $\gamma_i$  and  $\rho_i$ . The stability analysis gives:

$$\begin{aligned} S_A \text{ is stable} &\Leftrightarrow \gamma_B < \gamma_A + \rho_A \\ S_B \text{ is stable} &\Leftrightarrow \gamma_A < \gamma_B + \rho_B \end{aligned} \quad (2)$$

The equilibria  $S_A$  and  $S_B$  change stability through transcritical bifurcations, and when one of the consensus solutions is unstable, the other one is the unique stable solution.

Given Eq. (2), we can parametrise the system to minimise the chance of wrong decisions. We require that there exists only one stable solution for a quality difference above a target resolution  $R$ :

$$|v_A - v_B| / \max(v_A, v_B) > R \quad (3)$$

Let us assume  $v_A > v_B$ . On the one hand  $S_A$  must be the only stable solution, and therefore  $S_B$  should be unstable, hence  $\gamma_A > \gamma_B + \rho_B$ . On the other hand, the constraint on the target resolution implies that  $v_A - v_B / v_A > R$ . We select linear functions that link macroscopic transition rates to quality:

$$\gamma_i = f_\gamma(v_i) = k v_i \quad \rho_i = f_\rho(v_i) = h v_i, \quad i \in \{A, B\} \quad (4)$$

---

where  $k$  and  $h$  are tuneable parameters. To satisfy our design choices, we combine the above equations and solve the system:

$$\begin{cases} k v_A > k v_B + h v_B \\ v_A - v_B > v_A R \end{cases} \rightarrow k > h(1 - R)/R \quad (5)$$

An identical relation can be obtained assuming  $v_B > v_A$ . We arbitrarily select the target resolution  $R = 0.15$ , and we finally select a parameterisation that complies with the prescribed bounds:  $h = 0.1$  and  $k = 0.6$ .
